# Supplementary material for: Device-Assessed Physical Activity and Sedentary Behaviors in Canadians with Chronic Disease(s): Findings from the Canadian Health Measures Survey
Source: PubMed Central journal article supplement (PMC6571578; doi:10.3390/sports7050113), 2019-05-16

## Supplementary File

|                                                                                        |    |
|----------------------------------------------------------------------------------------|----|
| DESCRIPTIVE DATA .....                                                                 | 2  |
| Table 1 - Characteristics of physical activity and sedentary behavior by disease ..... | 2  |
| MULTIVARIATE ANALYSIS .....                                                            | 3  |
| Table 2 - Weighted ANCOVA table for CD and MVPA .....                                  | 3  |
| Table 3 - Weighted ANCOVA table for CD and LPA .....                                   | 4  |
| Table 4 - Weighted ANCOVA table for CD and steps .....                                 | 5  |
| Table 5 - Weighted ANCOVA table for CD and SB .....                                    | 6  |
| Table 6 - Weighted ANCOVA table for heart disease and MVPA .....                       | 7  |
| Table 7 - Weighted ANCOVA table for heart disease and LPA .....                        | 8  |
| Table 8 - Weighted ANCOVA table for heart disease and steps .....                      | 9  |
| Table 9 - Weighted ANCOVA table for heart disease and SB .....                         | 10 |
| Table 10 - Weighted ANCOVA table for cancer and MVPA .....                             | 11 |
| Table 11 - Weighted ANCOVA table for cancer and LPA .....                              | 12 |
| Table 12 - Weighted ANCOVA table for cancer and steps .....                            | 13 |
| Table 13 - Weighted ANCOVA table for cancer and SB .....                               | 14 |
| Table 14 - Weighted ANCOVA table for diabetes and MVPA .....                           | 15 |
| Table 15 - Weighted ANCOVA table for diabetes and LPA .....                            | 16 |
| Table 16 - Weighted ANCOVA table for diabetes and steps .....                          | 17 |
| Table 17 - Weighted ANCOVA table for diabetes and SB .....                             | 18 |

## DESCRIPTIVE DATA

**Table S1.** - Characteristics of physical activity and sedentary behavior by disease.

|                        | MVPA (min/day) |     |      |      | LPA (min/day) |      |       |       | Steps (steps/day) |       |      |      | SB (min/day) |      |       |       |
|------------------------|----------------|-----|------|------|---------------|------|-------|-------|-------------------|-------|------|------|--------------|------|-------|-------|
|                        | M              | Se  | Md   | IQR  | M             | Se   | Md    | IQR   | M                 | Se    | Md   | IQR  | M            | Se   | Md    | IQR   |
| <b>0 disease</b>       | 19.8           | 0.7 | 14.4 | 21.7 | 218.1         | 2.6  | 208.1 | 102.7 | 7817              | 104.6 | 7383 | 4604 | 555.3        | 2.5  | 561.3 | 123   |
| <b>1 disease</b>       | 15.6           | 1   | 8.6  | 18.1 | 205.9         | 4.2  | 195.8 | 106.8 | 7291              | 177.8 | 6645 | 4876 | 564.2        | 4.2  | 563.3 | 118.8 |
| <b>2 disease</b>       | 9.7            | 0.9 | 4.6  | 12   | 171.4         | 7    | 156.7 | 102.3 | 5779              | 303.5 | 5186 | 4133 | 579.7        | 6.4  | 578.6 | 126.8 |
| <b>3 or + diseases</b> | 6.4            | 1   | 3    | 6.8  | 155.4         | 9.6  | 153.1 | 79.4  | 5483              | 666.9 | 4926 | 3616 | 606.8        | 16.1 | 602.7 | 99.2  |
| <b>HD</b>              | 10.2           | 0.7 | 7.3  | 12.6 | 174.1         | 5.3  | 167.5 | 98.6  | 5991              | 204.1 | 5277 | 4241 | 463.1        | 15.7 | 541.2 | 381.9 |
| <b>Cancer</b>          | 16.8           | 2.3 | 9.1  | 20   | 188.9         | 5    | 185.6 | 100.7 | 6832              | 328   | 6235 | 4725 | 477.5        | 11.6 | 538.3 | 291.6 |
| <b>Diabetes</b>        | 12.3           | 2   | 6.6  | 15.4 | 174.1         | 11.1 | 156.2 | 87.6  | 6116              | 483.2 | 5397 | 3944 | 481.4        | 20.5 | 543.1 | 283.2 |

Note: HD is Heart disease, COPD is Chronic obstructive pulmonary disease, M is Mean, Se is Standard error, Md is Median, IQR is Interquartile range.

## MULTIVARIATE ANALYSIS

**Table S2.** - Weighted ANCOVA table for CD and MVPA.

(controlling for age, sex, body mass index, time of wearing the accelerometer, marital status, self-perceived health, self-perceived mental health, working status, season, smoking status (blood cotinine levels), education level and total household income).

|                          | Estimate | SE         | 95% CI            | t     | p          |
|--------------------------|----------|------------|-------------------|-------|------------|
| 1 CD                     | -0.53    | 0.05       | -0.16 – 0.05      | -1    | 0.32       |
| 2 CD                     | -0.33    | 0.07       | -0.47 – -0.2      | -4.83 | 0.0002E-02 |
| 3+ CD                    | -0.83    | 0.17       | -1.16 – -0.51     | -5.02 | 0.0007E-03 |
| Age                      | -0.01    | 0.02       | -0.01 – -0.006    | -5.73 | 0.0002E-04 |
| BMI                      | -0.03    | 0.005      | -0.04 – -0.03     | -7.36 | 0.0008E-09 |
| Sex (women)              | -0.28    | 0.04       | -0.36 – -0.2      | -7.18 | 0.0003E-08 |
| Accelerometer wearing    | 0.09     | 0.01       | 0.07 – 0.12       | 8.13  | 0.0004E-11 |
| Marital status (couple)  | -0.19    | 0.06       | -0.3 – -0.08      | -3.28 | 0.001      |
| Self-rated health        | -0.43    | 0.08       | -0.59 – -0.27     | -5.26 | 0.0002E-03 |
| Self-rated mental health | 0.2      | 0.12       | -0.03 – 0.44      | 1.68  | 0.09       |
| Worked last year         |          |            |                   |       |            |
| Study/retired            | -0.2     | 0.13       | -0.46 – 0.06      | -1.48 | 0.14       |
| Working                  | 0.09     | 0.07       | -0.05 – 0.22      | 1.29  | 0.2        |
| Seasons                  |          |            |                   |       |            |
| Spring                   | -0.005   | 0.08       | -0.16 – 0.15      | -0.07 | 0.95       |
| Summer                   | -0.06    | 0.06       | -0.17 – 0.15      | -1.06 | 0.29       |
| Winter                   | -0.12    | 0.1        | -0.32 – 0.09      | -1.13 | 0.26       |
| Levels of cotinine       | -0.0002  | 0.0004E-01 | -0.0003 – -0.0001 | -5.51 | 0.0006E-04 |
| Education                |          |            |                   |       |            |
| High school              | 0.13     | 0.12       | -0.1 – 0.37       | 1.11  | 0.27       |
| Work school              | 0.07     | 0.1        | -0.13 – 0.27      | 0.68  | 0.49       |
| College                  | 0.12     | 0.11       | -0.1 – 0.34       | 1.07  | 0.28       |
| University < Bachelor    | 0.21     | 0.1        | 0.01 – 0.4        | 2.09  | 0.04       |
| Bachelor                 | 0.33     | 0.13       | 0.08 – 0.57       | 2.58  | 0.01       |
| University > Bachelor    | 0.32     | 0.11       | 0.09 – 0.54       | 2.78  | 0.006      |
| Missing                  | 0.08     | 0.1        | -0.12 – 0.28      | 0.8   | 0.42       |
| Household income         |          |            |                   |       |            |
| \$15k-\$19,99k           | -0.14    | 0.19       | -0.52 – 0.24      | -0.72 | 0.47       |
| \$20k-\$29,99k           | -0.25    | 0.15       | -0.54 – 0.05      | -1.66 | 0.1        |
| \$30k-\$39,99k           | -0.21    | 0.13       | -0.47 – 0.05      | -1.59 | 0.11       |
| \$40k-\$49,99k           | -0.17    | 0.15       | -0.46 – 0.13      | -1.11 | 0.27       |
| \$50k-\$59,99k           | -0.21    | 0.16       | -0.52 – 0.1       | -1.34 | 0.18       |
| \$60k-\$79,99k           | -0.09    | 0.14       | -0.37 – 0.19      | -0.61 | 0.54       |
| \$80k-\$99,99k           | -0.006   | 0.15       | -0.29 – 0.28      | -0.04 | 0.97       |
| ≥ \$100k                 | 0.03     | 0.14       | -0.25 – 0.3       | 0.18  | 0.86       |

**Table S3.** - Weighted ANCOVA table for CD and LPA.

(controlling for age, sex, body mass index, time of wearing the accelerometer, marital status, self-perceived health, self-perceived mental health, working status, season, smoking status (blood cotinine levels), education level and total household income).

|                          | <b>Estimate</b> | <b>SE</b> | <b>95% CI</b>   | <b>t</b> | <b>p</b>   |
|--------------------------|-----------------|-----------|-----------------|----------|------------|
| 1 CD                     | -1.18           | 3.22      | -7.5 – 5.14     | -0.37    | 0.71       |
| 2 CD                     | -13.91          | 4.94      | -23.59 – -4.23  | -2.82    | 0.005      |
| 3+ CD                    | -30.54          | 7.37      | -44.99 – -16.08 | -4.14    | 0.0004E-01 |
| Age                      | -0.77           | 0.15      | -1.05 – -0.48   | -5.25    | 0.0002E-03 |
| BMI                      | -0.26           | 0.29      | -0.82 – 0.31    | -0.9     | 0.37       |
| Sex (women)              | -7.42           | 3.13      | -13.57 – -1.28  | -2.37    | 0.02       |
| Accelerometer wearing    | 26.29           | 1.1       | 24.13 – 28.44   | 23.92    | 0.0002E-12 |
| Marital status (couple)  | 6.75            | 3.84      | -0.77 – 14.27   | 1.76     | 0.08       |
| Self-rated health        | -15.41          | 5.11      | -25.42 – -5.4   | -3.02    | 0.003      |
| Self-rated mental health | -14.1           | 9         | -31.74 – 3.54   | -1.57    | 0.12       |
| Worked last year         |                 |           |                 |          |            |
| Study/retired            | -6.6            | 5.69      | -17.76 – 4.57   | -1.16    | 0.25       |
| Working                  | 11.77           | 3.66      | 4.6 – 18.93     | 3.22     | 0.001      |
| Seasons                  |                 |           |                 |          |            |
| Spring                   | 3.5             | 3.73      | -3.81 – 10.81   | 0.94     | 0.35       |
| Summer                   | 3.78            | 5.82      | -7.64 – 15.19   | 0.65     | 0.52       |
| Winter                   | -14.86          | 4.84      | -24.36 – -5.37  | -3.07    | 0.002      |
| Levels of cotinine       | -0.005          | 0.003     | -0.01 – 0.0002  | -1.9     | 0.06       |
| Education                |                 |           |                 |          |            |
| High school              | 20.27           | 11        | -1.29 – 41.84   | 1.84     | 0.07       |
| Work school              | 3.28            | 10.03     | -16.37 – 22.93  | 0.33     | 0.74       |
| College                  | -0.55           | 8.99      | -18.16 – 17.07  | -0.06    | 0.95       |
| University < Bachelor    | -3.95           | 8.58      | -20.77 – 12.86  | -0.46    | 0.65       |
| Bachelor                 | -13.49          | 9.27      | -31.67 – 4.69   | -1.46    | 0.15       |
| University > Bachelor    | -19.53          | 10.8      | -40.71 – 1.64   | -1.81    | 0.07       |
| Missing                  | 18.89           | 7.89      | 3.43 – 34.35    | 2.39     | 0.02       |
| Household income         |                 |           |                 |          |            |
| \$15k-\$19,99k           | -0.19           | 12.76     | -25.19 – 24.81  | -0.02    | 0.99       |
| \$20k-\$29,99k           | 2.84            | 9.99      | -16.75 – 22.43  | 0.28     | 0.78       |
| \$30k-\$39,99k           | 5.55            | 8.87      | -11.84 – 22.94  | 0.63     | 0.53       |
| \$40k-\$49,99k           | 9.41            | 11.88     | -13.86 – 32.69  | 0.79     | 0.43       |
| \$50k-\$59,99k           | 11.9            | 9.15      | -6.04 – 29.85   | 1.3      | 0.19       |
| \$60k-\$79,99k           | 12.19           | 8.12      | -3.72 – 28.11   | 1.5      | 0.13       |
| \$80k-\$99,99k           | 15.74           | 8.52      | -0.95 – 32.44   | 1.85     | 0.07       |
| ≥ \$100k                 | 1.74            | 7.59      | -13.13 – 16.61  | 0.23     | 0.82       |

**Table S4.** - Weighted ANCOVA table for CD and steps.

(controlling for age, sex, body mass index, time of wearing the accelerometer, marital status, self-perceived health, self-perceived mental health, working status, season, smoking status (blood cotinine levels), education level and total household income).

|                          | Estimate | SE     | 95% CI             | t     | p          |
|--------------------------|----------|--------|--------------------|-------|------------|
| 1 CD                     | -21.26   | 153.16 | -321.45 – 278.93   | -0.14 | 0.89       |
| 2 CD                     | -784.03  | 205.17 | -1186.16 – -381.91 | -3.82 | 0.0002     |
| 3+ CD                    | -1547.41 | 483.6  | -2495.25 – -599.56 | -3.2  | 0.001      |
| Age                      | -16.9    | 6.48   | -29.61 – -4.2      | -2.61 | 0.009      |
| BMI                      | -84.91   | 14.23  | -112.8 – -57.03    | -5.97 | 0.0005E-05 |
| Sex (women)              | -912.25  | 146.32 | -1199.04 – -625.46 | -6.23 | 0.0002E-12 |
| Accelerometer wearing    | 875.98   | 52.8   | 772.49 – 979.47    | 16.59 | 0.36       |
| Marital status (couple)  | -181.09  | 197.02 | -567.24 – 205.06   | -0.92 | 0.0003E-02 |
| Self-rated health        | -988.04  | 210.09 | -1399.82 – -576.27 | -4.7  | 0.13       |
| Self-rated mental health | -479.32  | 315.32 | -1097.33 – 138.7   | -1.52 | 0.8        |
| Worked last year         |          |        |                    |       |            |
| Study/retired            | -73.89   | 295.96 | -653.96 – 506.18   | -0.25 | 0.8        |
| Working                  | 471.57   | 212.19 | 55.7 – 887.5       | 2.22  | 0.03       |
| Seasons                  |          |        |                    |       |            |
| Spring                   | 95.61    | 225.81 | -346.97 – 538.19   | 0.42  | 0.67       |
| Summer                   | 90.18    | 214.11 | -329.47 – 509.83   | 0.42  | 0.67       |
| Winter                   | -825     | 226.66 | -1269.25 – -380.76 | -3.64 | 0.0003     |
| Levels of cotinine       | -0.49    | 0.14   | -0.77 – -0.21      | -3.46 | 0.0006     |
| Education                |          |        |                    |       |            |
| High school              | 784.66   | 380.32 | 39.24 – 1530.07    | 2.06  | 0.04       |
| Work school              | 436.28   | 379.16 | -306.86 – 1179.43  | 1.15  | 0.25       |
| College                  | 93.9     | 366.66 | -624.74 – 812.54   | 0.26  | 0.8        |
| University < Bachelor    | 660.93   | 327.48 | 19.08 – 1302.79    | 2.02  | 0.04       |
| Bachelor                 | 598.33   | 391.05 | -168.11 – 1364.77  | 1.53  | 0.13       |
| University > Bachelor    | 753.8    | 451.01 | -130.16 – 1637.77  | 1.67  | 0.1        |
| Missing                  | 956.78   | 355.31 | 260.34 – 1653.17   | 2.69  | 0.007      |
| Household income         |          |        |                    |       |            |
| \$15k-\$19,99k           | -535.54  | 491.86 | -1499.56 – 428.48  | -1.09 | 0.28       |
| \$20k-\$29,99k           | -347.09  | 470.2  | -1268.67 – 574.49  | -0.74 | 0.46       |
| \$30k-\$39,99k           | -301.98  | 412.37 | -1110.22 – 506.26  | -0.73 | 0.46       |
| \$40k-\$49,99k           | -214.67  | 516.33 | -1226.66 – 797.32  | -0.42 | 0.68       |
| \$50k-\$59,99k           | 123.63   | 417.04 | -693.74 – 941.01   | 0.3   | 0.77       |
| \$60k-\$79,99k           | -67.98   | 396.79 | -845.68 – 709.72   | -0.17 | 0.86       |
| \$80k-\$99,99k           | 345.39   | 418    | -473.87 – 1164.65  | 0.83  | 0.41       |
| ≥ \$100k                 | 224.72   | 366.55 | -493.71 – 943.15   | 0.61  | 0.54       |

**Table S5.** - Weighted ANCOVA table for CD and SB.

(controlling for age, sex, body mass index, time of wearing the accelerometer, marital status, self-perceived health, self-perceived mental health, working status, season, smoking status (blood cotinine levels), education level and total household income).

|                          | Estimate | SE    | 95% CI          | t     | p          |
|--------------------------|----------|-------|-----------------|-------|------------|
| 1 CD                     | 2.14     | 4.72  | -7.11 – 11.39   | 0.45  | 0.65       |
| 2 CD                     | 17.54    | 6.6   | 4.61 – 30.47    | 2.66  | 0.008      |
| 3+ CD                    | 39.97    | 12.99 | 14.51 – 65.43   | 3.08  | 0.002      |
| Age                      | 1.8      | 0.19  | 1.44 – 2.16     | 9.71  | 0.0002e-12 |
| BMI                      | 0.31     | 0.34  | -0.35 – 0.96    | 0.91  | 0.36       |
| Sex (women)              | 16.36    | 4.4   | 7.74 – 24.98    | 3.72  | 0.0002     |
| Accelerometer wearing    | 34.77    | 1.22  | 32.38 – 37.16   | 28.5  | 0.0002E-12 |
| Marital status (couple)  | -0.94    | 3.42  | -7.65 – 5.77    | -0.27 | 0.78       |
| Self-rated health        | 18.75    | 4.83  | 9.29 – 28.22    | 3.88  | 0.0001     |
| Self-rated mental health | 8.22     | 9.37  | -10.13 – 26.58  | 0.88  | 0.38       |
| Worked last year         |          |       |                 |       |            |
| Study/retired            | -7.45    | 5.97  | -19.16 – 4.25   | -1.25 | 0.21       |
| Working                  | -21.79   | 5.37  | -32.31 – -11.27 | -4.06 | 0.0006E-01 |
| Seasons                  |          |       |                 |       |            |
| Spring                   | -1.51    | 4.88  | -11.08 – 8.05   | -0.31 | 0.76       |
| Summer                   | -12.59   | 6.53  | -25.4 – 0.21    | -1.93 | 0.05       |
| Winter                   | 14.34    | 5.98  | 2.63 – 26.05    | 2.4   | 0.02       |
| Levels of cotinine       | -0.001   | 0.004 | -0.009 – 0.007  | -0.3  | 0.76       |
| Education                |          |       |                 |       |            |
| High school              | -6.98    | 10.74 | -28.02 – 14.06  | -0.65 | 0.52       |
| Work school              | 14.45    | 10.77 | -6.65 – 35.55   | 1.34  | 0.18       |
| College                  | 13.51    | 11.55 | -9.14 – 36.14   | 1.17  | 0.24       |
| University < Bachelor    | 23.76    | 9.82  | 4.52 – 43.01    | 2.42  | 0.02       |
| Bachelor                 | 22.12    | 9.79  | 2.93 – 41.3     | 2.26  | 0.02       |
| University > Bachelor    | 18.38    | 14.99 | -11.01 – 47.76  | 1.23  | 0.22       |
| Missing                  | -5.7     | 8.21  | -21.8 – 10.39   | -0.7  | 0.49       |
| Household income         |          |       |                 |       |            |
| \$15k-\$19,99k           | 9.29     | 14.23 | -18.61 – 37.19  | 0.65  | 0.51       |
| \$20k-\$29,99k           | 8.78     | 13.68 | -18.02 – 35.59  | 0.64  | 0.52       |
| \$30k-\$39,99k           | 2.52     | 13.37 | -23.68 – 28.73  | 0.19  | 0.85       |
| \$40k-\$49,99k           | -1.62    | 13.56 | -28.19 – 24.95  | -0.12 | 0.9        |
| \$50k-\$59,99k           | 5.25     | 12.78 | -19.8 – 30.30   | 0.41  | 0.68       |
| \$60k-\$79,99k           | -5.9     | 12.71 | -30.81 – 19.01  | -0.46 | 0.64       |
| \$80k-\$99,99k           | -1.94    | 12.96 | -27.34 – 23.47  | -0.15 | 0.88       |
| ≥ \$100k                 | 6.85     | 12    | -16.68 – 30.37  | 0.57  | 0.57       |

**Table S6.** - Weighted ANCOVA table for heart disease and MVPA.

(controlling for age, sex, body mass index, time of wearing the accelerometer, marital status, self-perceived health, self-perceived mental health, working status, season, smoking status (blood cotinine levels), education level and total household income).

|                          | Estimate | SE         | 95% CI            | t      | p          |
|--------------------------|----------|------------|-------------------|--------|------------|
| Heart disease            | -0.36    | 0.08       | -0.51 – -0.21     | -4.71  | 0.0003E-02 |
| Age                      | -0.01    | 0.002      | -0.01 – -0.007    | -5.96  | 0.0005E-05 |
| BMI                      | -0.03    | 0.005      | -0.04 – -0.03     | -7.62  | 0.0001E-09 |
| Sex (women)              | -0.28    | 0.04       | -0.35 – -0.2      | -7.33  | 0.0001E-08 |
| Accelerometer wearing    | 0.1      | 0.01       | 0.08 – 0.12       | 8.47   | 0.0003E-12 |
| Marital status (couple)  | -0.18    | 0.06       | -0.29 – -0.06     | -3     | 0.003      |
| Self-rated health        | -0.4     | 0.07       | -0.54 – -0.26     | -5.58  | 0.0004E-04 |
| Self-rated mental health | 0.07     | 0.08       | -0.09 – 0.23      | 0.86   | 0.39       |
| Worked last year         |          |            |                   |        |            |
| Study/retired            | -0.22    | 0.13       | -0.48 – 0.05      | -1.61  | 0.11       |
| Working                  | 0.09     | 0.07       | -0.04 – 0.22      | 1.34   | 0.18       |
| Seasons                  |          |            |                   |        |            |
| Spring                   | -0.003   | 0.08       | -0.15 – 0.15      | -0.03  | 0.97       |
| Summer                   | -0.05    | 0.06       | -0.16 – 0.06      | -0.92  | 0.36       |
| Winter                   | -0.13    | 0.1        | -0.33 – 0.07      | -1.25  | 0.21       |
| Levels of cotinine       | -0.0002  | 0.0003E-01 | -0.0003 – -0.0001 | -6.11  | 0.0002E-05 |
| Education                |          |            |                   |        |            |
| High school              | 0.09     | 0.11       | -0.13 – 0.31      | 0.81   | 0.42       |
| Work school              | 0.08     | 0.1        | -0.12 – 0.28      | 0.79   | 0.43       |
| College                  | 0.12     | 0.11       | -0.09 – 0.34      | 1.14   | 0.25       |
| University < Bachelor    | 0.21     | 0.1        | 0.02 – 0.4        | 2.16   | 0.03       |
| Bachelor                 | 0.32     | 0.12       | 0.08 – 0.57       | 2.62   | 0.009      |
| University > Bachelor    | 0.32     | 0.11       | 0.1 – 0.54        | 2.89   | 0.004      |
| Missing                  | 0.09     | 0.1        | -0.11 – 0.28      | 0.88   | 0.38       |
| Household income         |          |            |                   |        |            |
| \$15k-\$19,99k           | -0.18    | 0.19       | -0.56 – 0.2       | -0.94  | 0.35       |
| \$20k-\$29,99k           | -0.26    | 0.14       | -0.55 – 0.02      | -1.83  | 0.07       |
| \$30k-\$39,99k           | -0.28    | 0.13       | -0.54 – -0.02     | -2.14  | 0.03       |
| \$40k-\$49,99k           | -0.19    | 0.14       | -0.47 – 0.08      | -1.37  | 0.17       |
| \$50k-\$59,99k           | -0.24    | 0.15       | -0.54 – 0.06      | -1.56  | 0.12       |
| \$60k-\$79,99k           | -0.11    | 0.13       | -0.37 – 0.16      | -0.79  | 0.43       |
| \$80k-\$99,99k           | -0.03    | 0.14       | -0.31 – 0.24      | -0.25  | 0.81       |
| ≥ \$100k                 | -0.001   | 0.13       | -0.26 – 0.26      | -0.007 | 0.99       |

**Table S7.** - Weighted ANCOVA table for heart disease and LPA.

(controlling for age, sex, body mass index, time of wearing the accelerometer, marital status, self-perceived health, self-perceived mental health, working status, season, smoking status (blood cotinine levels), education level and total household income).

|                          | Estimate | SE    | 95% CI         | t     | p          |
|--------------------------|----------|-------|----------------|-------|------------|
| Heart disease            | -19.41   | 4.87  | -28.96 – -9.86 | -3.98 | 0.0008E-01 |
| Age                      | -0.79    | 0.14  | -1.06 – -0.52  | -5.78 | 0.0001E-04 |
| BMI                      | -0.2     | 0.28  | -0.76 – 0.36   | -0.71 | 0.48       |
| Sex (women)              | -5.98    | 2.78  | -11.4 – -0.53  | -2.15 | 0.03       |
| Accelerometer wearing    | 26       | 1.02  | 24 – 27.99     | 25.59 | 0.0002E-12 |
| Marital status (couple)  | 6.2      | 3.42  | -0.5 – 12.92   | 1.81  | 0.07       |
| Self-rated health        | -15.28   | 4.46  | -24.02 – -6.54 | -3.43 | 0.0007     |
| Self-rated mental health | -5.2     | 4.8   | -14.61 – 4.22  | -1.08 | 0.28       |
| Worked last year         |          |       |                |       |            |
| Study/retired            | -4.07    | 5.08  | -14.04 – 5.89  | -0.8  | 0.42       |
| Working                  | 14.41    | 3.4   | 7.75 – 21.07   | 4.24  | 0.0003E-01 |
| Seasons                  |          |       |                |       |            |
| Spring                   | 3.17     | 3.84  | -4.35 – 10.69  | 0.83  | 0.41       |
| Summer                   | 4.25     | 5.46  | -6.44 – 14.95  | 0.78  | 0.44       |
| Winter                   | -13.73   | 4.74  | -23.02 – -4.44 | -2.9  | 0.004      |
| Levels of cotinine       | -0.004   | 0.003 | -0.009 – 0.002 | -1.41 | 0.16       |
| Education                |          |       |                |       |            |
| High school              | 19.91    | 10.36 | -0.39 – 40.21  | 1.92  | 0.06       |
| Work school              | 0.13     | 10.33 | -20.12 – 20.38 | 0.01  | 0.99       |
| College                  | -5.43    | 9.05  | -23.18 – 12.31 | -0.6  | 0.55       |
| University < Bachelor    | -7.83    | 8.82  | -25.17 – 9.45  | -0.89 | 0.37       |
| Bachelor                 | -15.58   | 9.65  | -34.5 – 3.34   | -1.61 | 0.11       |
| University > Bachelor    | -23.78   | 10.77 | -44.9 – -2.67  | -2.21 | 0.03       |
| Missing                  | 15.32    | 8.23  | -0.81 – 31.45  | 1.86  | 0.06       |
| Household income         |          |       |                |       |            |
| \$15k-\$19,99k           | -0.61    | 11.87 | -23.88 – 22.67 | -0.05 | 0.96       |
| \$20k-\$29,99k           | 1.96     | 9.5   | -16.66 – 20.58 | 0.21  | 0.84       |
| \$30k-\$39,99k           | 6.84     | 8.31  | -9.45 – 23.13  | 0.82  | 0.41       |
| \$40k-\$49,99k           | 13.68    | 9.37  | -4.68 – 32.03  | 1.46  | 0.14       |
| \$50k-\$59,99k           | 14.76    | 7.98  | -0.89 – 30.41  | 1.85  | 0.07       |
| \$60k-\$79,99k           | 13.66    | 7.5   | -1.04 – 28.36  | 1.82  | 0.07       |
| \$80k-\$99,99k           | 16.66    | 8.16  | 0.68 – 32.65   | 2.04  | 0.04       |
| ≥ \$100k                 | 3.97     | 7.31  | -10.36 – 18.3  | 0.54  | 0.59       |



**Table S8.** - Weighted ANCOVA table for heart disease and steps.

(controlling for age, sex, body mass index, time of wearing the accelerometer, marital status, self-perceived health, self-perceived mental health, working status, season, smoking status (blood cotinine levels), education level and total household income).

|                          | Estimate | SE     | 95% CI             | t     | p          |
|--------------------------|----------|--------|--------------------|-------|------------|
| Heart disease            | -947.11  | 270.47 | -1477.23 – -417    | -3.5  | 0.0005     |
| Age                      | -17.61   | 6.6    | -30.54 – -4.68     | -2.67 | 0.008      |
| BMI                      | -85.28   | 14.08  | -112.88 – -57.69   | -6.06 | 0.0003E-05 |
| Sex (women)              | -916.01  | 141.97 | -1194.3 – -637.74  | -6.45 | 0.0003E-06 |
| Accelerometer wearing    | 871.52   | 52.18  | 769.24 – 973.79    | 16.7  | 0.0002E-12 |
| Marital status (couple)  | -180.54  | 192.21 | -557.26 – 196.18   | -0.94 | 0.35       |
| Self-rated health        | -970.11  | 207.63 | -1377.06 – -563.17 | -4.67 | 0.0004E-02 |
| Self-rated mental health | -482.5   | 301.53 | -1073.48 – 108.47  | -1.6  | 0.11       |
| Worked last year         |          |        |                    |       |            |
| Study/retired            | -24.01   | 292.8  | -597.88 – 549.86   | -0.08 | 0.93       |
| Working                  | 521.22   | 211.13 | 107.41 – 935.03    | 2.47  | 0.01       |
| Seasons                  |          |        |                    |       |            |
| Spring                   | 122.08   | 214.1  | -297.54 – 541.71   | 0.57  | 0.58       |
| Summer                   | 129.24   | 204.63 | -271.84 – 530.31   | 0.63  | 0.53       |
| Winter                   | -798.2   | 217.82 | -1225.17 – -371.28 | -3.67 | 0.0003     |
| Levels of cotinine       | -0.004   | 0.14   | -0.78 – -0.23      | -3.63 | 0.0003     |
| Education                |          |        |                    |       |            |
| High school              | 762.38   | 373.3  | 30.72 – 1494.04    | 2.04  | 0.04       |
| Work school              | 461.01   | 377.83 | -279.53 – 1201.55  | 1.22  | 0.22       |
| College                  | 75.5     | 353.39 | -617.13 – 768.12   | 0.21  | 0.83       |
| University < Bachelor    | 651.2    | 322.9  | 18.33 – 1284.07    | 2.02  | 0.04       |
| Bachelor                 | 560.27   | 387.24 | -198.71 – 1319.26  | 1.45  | 0.15       |
| University > Bachelor    | 727.14   | 422.75 | -140.64 – 1594.91  | 1.64  | 0.1        |
| Missing                  | 952.25   | 351.83 | 262.68 – 1641.82   | 2.71  | 0.007      |
| Household income         |          |        |                    |       |            |
| \$15k-\$19,99k           | -651.77  | 465.21 | -1563.55 – 260.02  | -1.4  | 0.16       |
| \$20k-\$29,99k           | -429.95  | 442.42 | -1297.08 – 437.18  | -0.97 | 0.33       |
| \$30k-\$39,99k           | -318.8   | 390.4  | -1083.96 – 446.36  | -0.82 | 0.41       |
| \$40k-\$49,99k           | -299.47  | 477.17 | -1234.71 – 635.78  | -0.63 | 0.53       |
| \$50k-\$59,99k           | 49.9     | 385.85 | -706.34 – 806.14   | 0.13  | 0.9        |
| \$60k-\$79,99k           | -84.38   | 359.44 | -788.87 – 620.11   | -0.24 | 0.81       |
| \$80k-\$99,99k           | 278.61   | 389.81 | -485.42 – 1042.63  | 0.72  | 0.48       |
| ≥ \$100k                 | 179.54   | 337.9  | -482.73 – 841.81   | 0.53  | 0.6        |

**Table S9.** - Weighted ANCOVA table for heart disease and SB.

(controlling for age, sex, body mass index, time of wearing the accelerometer, marital status, self-perceived health, self-perceived mental health, working status, season, smoking status (blood cotinine levels), education level and total household income).

|                          | Estimate | SE    | 95% CI         | t     | p          |
|--------------------------|----------|-------|----------------|-------|------------|
| Heart disease            | 21.95    | 7.66  | 6.93 – 36.96   | 2.87  | 0.004      |
| Age                      | 1.83     | 0.18  | 1.48 – 2.18    | 10.26 | 0.0002E-12 |
| BMI                      | 0.33     | 0.33  | -0.32 – 0.97   | 1     | 0.32       |
| Sex (women)              | 16.49    | 4.14  | 8.38 – 24.61   | 3.98  | 0.0008E-01 |
| Accelerometer wearing    | 34.83    | 1.19  | 32.5 – 37.15   | 29.31 | 0.0002E-12 |
| Marital status (couple)  | -0.64    | 3.37  | -7.26 – 5.97   | -0.19 | 0.85       |
| Self-rated health        | 17.59    | 4.81  | 8.17 – 27.02   | 3.66  | 0.0003     |
| Self-rated mental health | 7.8      | 8.94  | -9.73 – 25.32  | 0.87  | 0.38       |
| Worked last year         |          |       |                |       |            |
| Study/retired            | -8.2     | 5.95  | -19.87 – 3.46  | -1.38 | 0.17       |
| Working                  | -22.57   | 5.12  | -32.6 – -12.54 | -4.41 | 0.0001E-01 |
| Seasons                  |          |       |                |       |            |
| Spring                   | -2.17    | 4.86  | -11.69 – 7.35  | -0.45 | 0.66       |
| Summer                   | -13.3    | 6.37  | -25.78 – -0.82 | -2.09 | 0.04       |
| Winter                   | 13.67    | 5.94  | 2.04 – 25.31   | 2.3   | 0.02       |
| Levels of cotinine       | -0.0005  | 0.004 | -0.008 – 0.007 | -0.13 | 0.9        |
| Education                |          |       |                |       |            |
| High school              | -6.46    | 10.41 | -26.87 – 13.95 | -0.62 | 0.54       |
| Work school              | 13.83    | 10.53 | -6.83 – 34.45  | 1.31  | 0.19       |
| College                  | 14.16    | 11.53 | -8.43 – 36.75  | 1.23  | 0.22       |
| University < Bachelor    | 24.01    | 9.6   | 5.2 – 42.83    | 2.5   | 0.01       |
| Bachelor                 | 22.88    | 9.59  | 4.09 – 41.66   | 2.39  | 0.02       |
| University > Bachelor    | 18.96    | 14.86 | -0.1 – 48.09   | 1.28  | 0.2        |
| Missing                  | -6.1     | 8     | -21.78 – 9.59  | -0.76 | 0.45       |
| Household income         |          |       |                |       |            |
| \$15k-\$19,99k           | 10.2     | 13.37 | -16.01 – 36.41 | 0.76  | 0.45       |
| \$20k-\$29,99k           | 9.46     | 12.7  | -15.43 – 34.35 | 0.75  | 0.46       |
| \$30k-\$39,99k           | 1.81     | 12.62 | -22.93 – 26.54 | 0.14  | 0.89       |
| \$40k-\$49,99k           | -1.65    | 12.47 | -26.09 – 22.79 | -0.13 | 0.89       |
| \$50k-\$59,99k           | 5.27     | 11.74 | -17.74 – 28.28 | 0.45  | 0.65       |
| \$60k-\$79,99k           | -6.63    | 11.92 | -29.99 – 16.72 | -0.56 | 0.58       |
| \$80k-\$99,99k           | -1.95    | 12.5  | -26.45 – 22.55 | -0.16 | 0.88       |
| ≥ \$100k                 | 6.16     | 11    | -15.39 – 27.72 | 0.56  | 0.58       |

**Table S10.** - Weighted ANCOVA table for cancer and MVPA.

(controlling for age, sex, body mass index, time of wearing the accelerometer, marital status, self-perceived health, self-perceived mental health, working status, season, smoking status (blood cotinine levels), education level and total household income).

|                          | Estimate | SE         | 95% CI            | t     | p          |
|--------------------------|----------|------------|-------------------|-------|------------|
| Cancer                   | -0.13    | 0.06       | -0.25 – -0.01     | -2.13 | 0.03       |
| Age                      | -0.01    | 0.002      | -0.01 – -0.008    | -6.61 | 0.0001E-06 |
| BMI                      | -0.03    | 0.005      | -0.04 – -0.03     | -7.54 | 0.0002E-09 |
| Sex (women)              | -0.27    | 0.04       | -0.34 – -0.2      | -7.15 | 0.0003E-08 |
| Accelerometer wearing    | 0.09     | 0.01       | 0.07 – 0.12       | 8.04  | 0.0008E-11 |
| Marital status (couple)  | -0.18    | 0.06       | -0.29 – -0.06     | -3.06 | 0.002      |
| Self-rated health        | -0.45    | 0.08       | -0.61 – -0.29     | -5.58 | 0.0004E-04 |
| Self-rated mental health | 0.19     | 0.12       | -0.04 – 0.42      | 1.6   | 0.11       |
| Worked last year         |          |            |                   |       |            |
| Study/retired            | -0.21    | 0.13       | -0.47 – 0.05      | -1.61 | 0.11       |
| Working                  | 0.1      | 0.07       | -0.03 – 0.22      | 1.44  | 0.15       |
| Seasons                  |          |            |                   |       |            |
| Spring                   | -0.01    | 0.08       | -0.17 – 0.14      | -0.18 | 0.86       |
| Summer                   | -0.05    | 0.06       | -0.16 – 0.05      | -0.98 | 0.33       |
| Winter                   | -0.12    | 0.1        | -0.32 – 0.09      | -1.14 | 0.26       |
| Levels of cotinine       | -0.0002  | 0.0003E-01 | -0.0003 – -0.0001 | -5.85 | 0.0009E-05 |
| Education                |          |            |                   |       |            |
| High school              | 0.12     | 0.12       | -0.11 – 0.31      | 1.03  | 0.3        |
| Work school              | 0.07     | 0.1        | -0.13 – 0.28      | 0.68  | 0.5        |
| College                  | 0.12     | 0.11       | -0.1 – 0.34       | 1.06  | 0.29       |
| University < Bachelor    | 0.2      | 0.1        | 0.006 – 0.4       | 2.02  | 0.04       |
| Bachelor                 | 0.32     | 0.13       | 0.07 – 0.57       | 2.55  | 0.01       |
| University > Bachelor    | 0.32     | 0.11       | 0.1 – 0.54        | 2.83  | 0.005      |
| Missing                  | 0.08     | 0.1        | -0.12 – 0.28      | 0.78  | 0.44       |
| Household income         |          |            |                   |       |            |
| \$15k-\$19,99k           | -0.16    | 0.19       | -0.53 – 0.21      | -0.84 | 0.4        |
| \$20k-\$29,99k           | -0.25    | 0.14       | -0.53 – 0.03      | -1.73 | 0.09       |
| \$30k-\$39,99k           | -0.22    | 0.12       | -0.46 – -0.02     | -1.79 | 0.07       |
| \$40k-\$49,99k           | -0.18    | 0.14       | -0.45 – 0.1       | -1.28 | 0.2        |
| \$50k-\$59,99k           | -0.23    | 0.15       | -0.53 – 0.07      | -1.49 | 0.14       |
| \$60k-\$79,99k           | -0.09    | 0.13       | -0.36 – 0.17      | -0.67 | 0.5        |
| \$80k-\$99,99k           | -0.01    | 0.14       | -0.28 – 0.26      | -0.07 | 0.94       |
| ≥ \$100k                 | 0.02     | 0.13       | -0.24 – 0.28      | 0.15  | 0.88       |

**Table S11.** - Weighted ANCOVA table for cancer and LPA.

(controlling for age, sex, body mass index, time of wearing the accelerometer, marital status, self-perceived health, self-perceived mental health, working status, season, smoking status (blood cotinine levels), education level and total household income).

|                          | Estimate | SE    | 95% CI         | t     | p          |
|--------------------------|----------|-------|----------------|-------|------------|
| Cancer                   | -5.25    | 3.74  | -12.58 – 2.07  | -1.41 | 0.16       |
| Age                      | -0.83    | 0.14  | -1.09 – -0.56  | -6.06 | 0.0003E-05 |
| BMI                      | -0.2     | 0.28  | -0.76 – 0.35   | -0.71 | 0.48       |
| Sex (women)              | -5.17    | 2.76  | -10.58 – 0.24  | -1.87 | 0.06       |
| Accelerometer wearing    | 26       | 1.02  | 24 – 28        | 25.62 | 0.0002E-12 |
| Marital status (couple)  | 6.56     | 3.38  | -0.06 – 13.19  | 1.94  | 0.05       |
| Self-rated health        | -16.63   | 4.4   | -25.26 – -8    | -3.78 | 0.0002     |
| Self-rated mental health | -4.22    | 4.85  | -13.74 – 5.29  | -0.87 | 0.38       |
| Worked last year         |          |       |                |       |            |
| Study/retired            | -5.14    | 5.21  | -15.36 – 5.07  | -0.99 | 0.32       |
| Working                  | 14.92    | 3.47  | 8.12 – 21.73   | 4.3   | 0.0002E-01 |
| Seasons                  |          |       |                |       |            |
| Spring                   | 2.56     | 3.88  | -5.04 – 10.16  | 0.66  | 0.51       |
| Summer                   | 4.09     | 5.47  | -6.63 – 14.82  | 0.75  | 0.45       |
| Winter                   | -13.71   | 4.78  | -23.09 – -4.33 | -2.87 | 0.004      |
| Levels of cotinine       | -0.004   | 0.003 | -0.009 – 0.002 | -1.36 | 0.17       |
| Education                |          |       |                |       |            |
| High school              | 19.36    | 10.34 | -0.9 – 39.63   | 1.87  | 0.06       |
| Work school              | -0.46    | 10.43 | -20.9 – 19.98  | -0.04 | 0.96       |
| College                  | -5.43    | 9.17  | -23.39 – 12.54 | -0.59 | 0.55       |
| University < Bachelor    | -8.24    | 8.91  | -25.7 – 9.21   | -0.93 | 0.36       |
| Bachelor                 | -15.5    | 9.71  | -34.54 – 3.53  | -1.6  | 0.11       |
| University > Bachelor    | -23.34   | 10.96 | -44.82 – -1.86 | -2.13 | 0.03       |
| Missing                  | 14.91    | 8.26  | -1.27 – 31.09  | 1.81  | 0.07       |
| Household income         |          |       |                |       |            |
| \$15k-\$19,99k           | 0.81     | 12.21 | -23.12 – 24.75 | 0.07  | 0.95       |
| \$20k-\$29,99k           | 2.78     | 9.61  | -16.06 – 21.62 | 0.29  | 0.77       |
| \$30k-\$39,99k           | 7.29     | 8.57  | -9.5 – 24.09   | 0.85  | 0.4        |
| \$40k-\$49,99k           | 14.19    | 9.55  | -4.54 – 32.92  | 1.49  | 0.14       |
| \$50k-\$59,99k           | 15.17    | 8.16  | -0.83 – 31.17  | 1.86  | 0.06       |
| \$60k-\$79,99k           | 13.86    | 7.75  | -1.33 – 29.04  | 1.79  | 0.07       |
| \$80k-\$99,99k           | 17.44    | 8.43  | 0.9 – 33.97    | 2.07  | 0.04       |
| ≥ \$100k                 | 4.37     | 7.52  | -10.36 – 19.1  | 0.58  | 0.56       |

**Table S12.** - Weighted ANCOVA table for cancer and steps.

(controlling for age, sex, body mass index, time of wearing the accelerometer, marital status, self-perceived health, self-perceived mental health, working status, season, smoking status (blood cotinine levels), education level and total household income).

|                          | Estimate | SE     | 95% CI             | t     | p          |
|--------------------------|----------|--------|--------------------|-------|------------|
| Cancer                   | -207.26  | 184.35 | -568.58 – 154.06   | -1.12 | 0.26       |
| Age                      | -19.41   | 6.48   | -32.11 – -6.72     | -3    | 0.003      |
| BMI                      | -85.97   | 14.08  | -113.57 – -58.36   | -6.1  | 0.0002E-05 |
| Sex (women)              | -875.69  | 139.48 | -1149.07 – -602.3  | -6.28 | 0.0008E-06 |
| Accelerometer wearing    | 872.42   | 52.27  | 769.97 – 9734.86   | 16.69 | 0.0002E-12 |
| Marital status (couple)  | -154     | 193.01 | -532.29 – 224.29   | -0.8  | 0.43       |
| Self-rated health        | -1027.02 | 203.41 | -1425.69 – -628.35 | -5.05 | 0.0006E-03 |
| Self-rated mental health | -414.42  | 308.26 | -1018.59 – 189.75  | -1.34 | 0.18       |
| Worked last year         | -75.9    | 296.62 | -657.27 – 505.47   | -0.26 | 0.8        |
| Study/retired            | 550.36   | 205.43 | 147.73 – 952.99    | 2.68  | 0.008      |
| Seasons                  |          |        |                    |       |            |
| Spring                   | 89.74    | 221.57 | -344.53 – 524.02   | 0.41  | 0.69       |
| Summer                   | 123.58   | 202.83 | -273.97 – 521.13   | 0.61  | 0.54       |
| Winter                   | -800.79  | 218.87 | -1229.77 – -371.8  | -3.65 | 0.0003     |
| Levels of cotinine       | -0.5     | 0.14   | -0.78 – -0.22      | -3.53 | 0.0005     |
| Education                |          |        |                    |       |            |
| High school              | 730.21   | 371.3  | 1.82 – 1494.04     | 1.97  | 0.05       |
| Work school              | 423.71   | 377.83 | -316.19 – 1201.55  | 1.12  | 0.26       |
| College                  | 79.36    | 353.39 | -620.65 – 768.12   | 0.22  | 0.82       |
| University < Bachelor    | 629.56   | 322.9  | -4.54 – 1284.07    | 1.95  | 0.05       |
| Bachelor                 | 560.71   | 387.24 | -199.68 – 1319.26  | 1.45  | 0.15       |
| University > Bachelor    | 743.94   | 422.75 | -134.14 – 1594.91  | 1.66  | 0.1        |
| Missing                  | 931.22   | 351.83 | 248.43 – 1641.82   | 2.67  | 0.01       |
| Household income         |          |        |                    |       |            |
| \$15k-\$19,99k           | -545     | 475.24 | -1476.45 – 386.46  | -1.15 | 0.25       |
| \$20k-\$29,99k           | -381.03  | 444.29 | -1251.82 – 489.77  | -0.86 | 0.39       |
| \$30k-\$39,99k           | -291.52  | 400.62 | -1076.71 – 493.67  | -0.73 | 0.47       |
| \$40k-\$49,99k           | -278.74  | 484.15 | -1227.66 – 670.18  | -0.58 | 0.57       |
| \$50k-\$59,99k           | 61.17    | 395.76 | -714.52 – 836.85   | 0.16  | 0.88       |
| \$60k-\$79,99k           | -71.1    | 373.24 | -802.64 – 660.45   | -0.19 | 0.85       |
| \$80k-\$99,99k           | 318.53   | 399.37 | -464.22 – 1101.28  | 0.8   | 0.43       |
| ≥ \$100k                 | 202.37   | 344.7  | -473.22 – 877.96   | 0.59  | 0.56       |

**Table S13.** - Weighted ANCOVA table for cancer and SB.

(controlling for age, sex, body mass index, time of wearing the accelerometer, marital status, self-perceived health, self-perceived mental health, working status, season, smoking status (blood cotinine levels), education level and total household income).

|                          | Estimate | SE    | 95% CI          | t     | p          |
|--------------------------|----------|-------|-----------------|-------|------------|
| Cancer                   | 8.69     | 4.09  | 0.67 – 16.7     | 2.12  | 0.03       |
| Age                      | 1.85     | 0.17  | 1.52 – 2.18     | 10.87 | 0.0002E-12 |
| BMI                      | 0.33     | 0.33  | -0.32 – 0.98    | 0.99  | 0.32       |
| Sex (women)              | 15.33    | 4.23  | 7.04 – 23.62    | 3.62  | 0.0003     |
| Accelerometer wearing    | 34.79    | 1.18  | 32.48 – 37.09   | 29.58 | 0.0002E-12 |
| Marital status (couple)  | -0.11    | 3.39  | -7.77 – 5.53    | -0.33 | 0.74       |
| Self-rated health        | 18.95    | 4.8   | 9.56 – 28.35    | 3.95  | 0.0009E-01 |
| Self-rated mental health | 5.99     | 9.09  | -11.84 – 23.81  | 0.66  | 0.51       |
| Worked last year         |          |       |                 |       |            |
| Study/retired            | -7.39    | 6.16  | -19.46 – 4.68   | -1.2  | 0.23       |
| Working                  | -22.94   | 5.3   | -33.33 – -12.54 | -4.33 | 0.0002E-01 |
| Seasons                  |          |       |                 |       |            |
| Spring                   | -1.79    | 4.79  | -11.18 – 7.6    | -0.37 | 0.71       |
| Summer                   | -13.14   | 6.27  | -25.44 – -0.85  | -2.1  | 0.04       |
| Winter                   | 13.73    | 5.86  | 2.25 – 25.22    | 2.34  | 0.02       |
| Levels of cotinine       | -0.0007  | 0.004 | -0.008 – 0.007  | -0.19 | 0.85       |
| Education                |          |       |                 |       |            |
| High school              | -5.68    | 10.5  | -26.25 – 14.89  | -0.54 | 0.59       |
| Work school              | 14.15    | 10.67 | -6.77 – 35.06   | 1.33  | 0.19       |
| College                  | 14.37    | 11.75 | -8.65 – 37.39   | 1.22  | 0.22       |
| University < Bachelor    | 24.43    | 9.77  | 5.29 – 43.57    | 0.01  | 0.01       |
| Bachelor                 | 22.75    | 9.8   | 3.55 – 41.95    | 0.02  | 0.02       |
| University > Bachelor    | 18.34    | 15.08 | -11.21 – 47.89  | 0.22  | 0.22       |
| Missing                  | -5.51    | 8.08  | -21.35 – 10.32  | 0.5   | 0.5        |
| Household income         |          |       |                 |       |            |
| \$15k-\$19,99k           | 8.72     | 13.33 | -17.4 – 34.85   | 0.51  | 0.51       |
| \$20k-\$29,99k           | 8.64     | 13.03 | -16.89 – 34.18  | 0.51  | 0.51       |
| \$30k-\$39,99k           | 1.16     | 12.88 | -24.08 – 26.4   | 0.93  | 0.93       |
| \$40k-\$49,99k           | -2.27    | 12.76 | -27.29 – 22.75  | 0.86  | 0.86       |
| \$50k-\$59,99k           | 4.72     | 12.03 | -18.85 – 28.29  | 0.69  | 0.69       |
| \$60k-\$79,99k           | -7.04    | 12.15 | -30.86 – 16.77  | 0.56  | 0.56       |
| \$80k-\$99,99k           | -3.68    | 12.68 | -28.53 – 21.18  | 0.77  | 0.77       |
| ≥ \$100k                 | 5.49     | 12.29 | -16.63 – 27.61  | 0.63  | 0.63       |

**Table S14.** - Weighted ANCOVA table for diabetes and MVPA.

(controlling for age, sex, body mass index, time of wearing the accelerometer, marital status, self-perceived health, self-perceived mental health, working status, season, smoking status (blood cotinine levels), education level and total household income).

|                          | Estimate | SE         | 95% CI            | t     | p          |
|--------------------------|----------|------------|-------------------|-------|------------|
| Diabetes                 | -0.12    | 0.12       | -0.34 – 0.11      | -1    | 0.32       |
| Age                      | -0.11    | 0.002      | -0.01 – -0.007    | -6.11 | 0.0002E-05 |
| BMI                      | -0.34    | 0.005      | -0.04 – -0.03     | -7.17 | 0.0003E-08 |
| Sex (women)              | -0.27    | 0.04       | -0.34 – -0.19     | -7.06 | 0.0006E-08 |
| Accelerometer wearing    | 0.1      | 0.01       | 0.07 – 0.12       | 8.3   | 0.0001E-11 |
| Marital status (couple)  | -0.17    | 0.06       | -0.28 – -0.05     | -2.89 | 0.004      |
| Self-rated health        | -0.41    | 0.07       | -0.55 – -0.27     | -5.64 | 0.0003E-04 |
| Self-rated mental health | 0.08     | 0.09       | -0.08 – 0.25      | 0.98  | 0.33       |
| Worked last year         |          |            |                   |       |            |
| Study/retired            | -0.23    | 0.13       | -0.48 – 0.03      | -1.73 | 0.08       |
| Working                  | 0.1      | 0.07       | -0.03 – 0.23      | 1.49  | 0.14       |
| Seasons                  |          |            |                   |       |            |
| Spring                   | -0.009   | 0.08       | -0.16 – 0.14      | -0.11 | 0.91       |
| Summer                   | -0.05    | 0.06       | -0.16 – 0.06      | -0.92 | 0.36       |
| Winter                   | -0.13    | 0.1        | -0.33 – 0.08      | -1.23 | 0.22       |
| Levels of cotinine       | -0.0002  | 0.0003E-01 | -0.0003 – -0.0001 | -5.93 | 0.0006E-05 |
| Education                |          |            |                   |       |            |
| High school              | 0.08     | 0.11       | -0.14 – 0.3       | 0.68  | 0.5        |
| Work school              | 0.07     | 0.1        | -0.13 – 0.27      | 0.65  | 0.51       |
| College                  | 0.12     | 0.11       | -0.1 – 0.33       | 1.07  | 0.29       |
| University < Bachelor    | 0.19     | 0.1        | 0.002 – 0.38      | 1.98  | 0.05       |
| Bachelor                 | 0.32     | 0.12       | 0.07 – 0.56       | 2.55  | 0.01       |
| University > Bachelor    | 0.31     | 0.11       | 0.09 – 0.53       | 2.8   | 0.005      |
| Missing                  | 0.07     | 0.1        | -0.12 – 0.27      | 0.75  | 0.46       |
| Household income         |          |            |                   |       |            |
| \$15k-\$19,99k           | -0.18    | 0.19       | -0.56 – 0.2       | -0.93 | 0.35       |
| \$20k-\$29,99k           | -0.25    | 0.15       | -0.54 – 0.03      | -1.74 | 0.08       |
| \$30k-\$39,99k           | -0.27    | 0.14       | -0.54 – -0.007    | -2.01 | 0.04       |
| \$40k-\$49,99k           | -0.19    | 0.14       | -0.47 – 0.09      | -1.31 | 0.19       |
| \$50k-\$59,99k           | -0.24    | 0.15       | -0.55 – 0.06      | -1.58 | 0.112      |
| \$60k-\$79,99k           | -0.11    | 0.14       | -0.38 – 0.16      | -0.78 | 0.44       |
| \$80k-\$99,99k           | -0.03    | 0.14       | -0.3 – 0.25       | -0.19 | 0.85       |
| ≥ \$100k                 | 0.05E-03 | 0.14       | -0.27 – 0.27      | 0.01  | 1          |

**Table S15.** - Weighted ANCOVA table for diabetes and LPA.

(controlling for age, sex, body mass index, time of wearing the accelerometer, marital status, self-perceived health, self-perceived mental health, working status, season, smoking status (blood cotinine levels), education level and total household income).

|                          | Estimate | SE    | 95% CI          | t     | p          |
|--------------------------|----------|-------|-----------------|-------|------------|
| Diabetes                 | -15.32   | 4.58  | -24.3 – -6.34   | -3.34 | 0.0009     |
| Age                      | -0.78    | 0.14  | -1.05 – -0.49   | -5.33 | 0.0002E-03 |
| BMI                      | -0.06    | 0.29  | -0.63 – 0.5     | -0.22 | 0.83       |
| Sex (women)              | -5.55    | 2.87  | -11.18 – 0.08   | -1.93 | 0.05       |
| Accelerometer wearing    | 25.92    | 1.02  | 23.92 – 27.93   | 25.34 | 0.0002E-12 |
| Marital status (couple)  | 7.57     | 3.45  | 0.08 – 14.34    | 2.19  | 0.03       |
| Self-rated health        | -18.34   | 4.09  | -26.35 – -10.33 | -4.49 | 0.0009E-02 |
| Self-rated mental health | -4.14    | 5.19  | -14.31 – 6.03   | -0.8  | 0.43       |
| Worked last year         |          |       |                 |       |            |
| Study/retired            | -6.58    | 5.19  | -16.75 – 3.59   | -1.27 | 0.21       |
| Working                  | 14.32    | 3.36  | 7.74 – 20.9     | 4.27  | 0.0002E-01 |
| Seasons                  |          |       |                 |       |            |
| Spring                   | 2.77     | 3.86  | -4.79 – 10.33   | 0.72  | 0.47       |
| Summer                   | 3        | 5.51  | -7.79 – 13.79   | 0.54  | 0.59       |
| Winter                   | -13.43   | 4.75  | -2.27 – -4.11   | -2.82 | 0.005      |
| Levels of cotinine       | -0.005   | 0.003 | -0.01 – 0.0005  | -1.75 | 0.08       |
| Education                |          |       |                 |       |            |
| High school              | 24.71    | 10.57 | 3.98 – 45.43    | 2.34  | 0.02       |
| Work school              | 5.21     | 10.72 | -15.81 – 26.22  | 0.49  | 0.63       |
| College                  | 0.07     | 9.66  | -18.86 – 19.01  | 0.008 | 0.99       |
| University < Bachelor    | -2.61    | 9.26  | -20.75 – 15.54  | -0.28 | 0.78       |
| Bachelor                 | -10.05   | 10.31 | -30.25 – 10.16  | -0.98 | 0.33       |
| University > Bachelor    | -18.68   | 11.47 | -41.15 – 3.79   | -1.63 | 0.1        |
| Missing                  | 20.44    | 8.67  | 3.44 – 37.44    | 2.36  | 0.02       |
| Household income         |          |       |                 |       |            |
| \$15k-\$19,99k           | 0.26     | 12.13 | -23.52 – 24.04  | 0.02  | 0.98       |
| \$20k-\$29,99k           | 3.55     | 9.59  | -15.24 – 22.34  | 0.37  | 0.71       |
| \$30k-\$39,99k           | 7.93     | 8.38  | -8.48 – 24.35   | 0.95  | 0.34       |
| \$40k-\$49,99k           | 14.81    | 9.72  | -4.25 – 33.86   | 1.52  | 0.13       |
| \$50k-\$59,99k           | 12.7     | 8.34  | -3.65 – 29.04   | 1.52  | 0.03       |
| \$60k-\$79,99k           | 13.65    | 7.74  | -1.51 – 28.82   | 1.77  | 0.08       |
| \$80k-\$99,99k           | 15.87    | 8.31  | -0.43 – 3.22    | 1.91  | 0.06       |
| ≥ \$100k                 | 36.96    | 7.12  | -10.25 – 17.64  | 0.52  | 0.6        |



**Table S16.** - Weighted ANCOVA table for diabetes and steps.

(controlling for age, sex, body mass index, time of wearing the accelerometer, marital status, self-perceived health, self-perceived mental health, working status, season, smoking status (blood cotinine levels), education level and total household income).

|                          | Estimate | SE     | 95% CI             | t     | p          |
|--------------------------|----------|--------|--------------------|-------|------------|
| Diabetes                 | -406.52  | 235.67 | -868.42 – 55.37    | -1.73 | 0.09       |
| Age                      | -18.64   | 6.74   | -31.84 – -5.44     | -2.77 | 0.006      |
| BMI                      | -82.56   | 14.62  | -111.23 – -53.9    | -5.65 | 0.0003E-04 |
| Sex (women)              | -884.22  | 143.06 | -1164.62 – -603.81 | -6.18 | 0.0001E-05 |
| Accelerometer wearing    | 871.44   | 53.7   | 766.19 – 976.68    | 16.23 | 0.0002E-12 |
| Marital status (couple)  | -153.28  | 191.95 | -529.49 – 222.94   | -0.8  | 0.42       |
| Self-rated health        | -1002.82 | 209.55 | -1413.54 – -592.1  | -4.79 | 0.0002E-02 |
| Self-rated mental health | -473.45  | 306.51 | -1074.2 – 127.31   | -1.55 | 0.12       |
| Worked last year         |          |        |                    |       |            |
| Study/retired            | -101.03  | 294.05 | -677.36 – 475.3    | -0.34 | 0.73       |
| Working                  | 544.35   | 204.23 | 144.06 – 944.64    | 2.67  | 0.008      |
| Seasons                  |          |        |                    |       |            |
| Spring                   | 98.55    | 219.48 | -331.62 – 528.73   | 0.45  | 0.65       |
| Summer                   | 128      | 201.73 | -267.39 – 523.39   | 0.63  | 0.53       |
| Winter                   | -794.22  | 218.69 | -1222.84 – -365.59 | -3.63 | 0.0003     |
| Levels of cotinine       | -0.5     | 0.14   | -0.78 – -0.23      | -3.6  | 0.0004     |
| Education                |          |        |                    |       |            |
| High school              | 712.38   | 375.73 | -24.03 – 1494.04   | 1.9   | 0.06       |
| Work school              | 416.55   | 381.11 | -330.42 – 1201.55  | 1.09  | 0.27       |
| College                  | 63.03    | 358.14 | -638.91 – 768.12   | 0.18  | 0.86       |
| University < Bachelor    | 618.59   | 326.35 | -21.04 – 1284.07   | 1.9   | 0.06       |
| Bachelor                 | 549.27   | 388.26 | -211.71 – 1319.26  | 1.42  | 0.16       |
| University > Bachelor    | 711.58   | 446.51 | -163.57 – 1594.91  | 1.59  | 0.11       |
| Missing                  | 918.01   | 354.64 | 222.93 – 1641.82   | 2.59  | 0.01       |
| Household income         |          |        |                    |       |            |
| \$15k-\$19,99k           | -612.01  | 479.64 | -1552.09 – 328.07  | -1.28 | 0.2        |
| \$20k-\$29,99k           | -357.9   | 452.46 | -1244.69 – 528.9   | -0.79 | 0.43       |
| \$30k-\$39,99k           | -260.05  | 393.61 | -1031.51 – 511.41  | -0.66 | 0.51       |
| \$40k-\$49,99k           | -247.87  | 493.48 | -1215.06 – 719.33  | -0.5  | 0.62       |
| \$50k-\$59,99k           | 64.58    | 400.52 | -720.43 – 849.59   | 0.16  | 0.87       |
| \$60k-\$79,99k           | -60.19   | 383.44 | -811.72 – 691.35   | -0.16 | 0.88       |
| \$80k-\$99,99k           | 320.27   | 403.46 | -470.5 – 1111.05   | 0.79  | 0.43       |
| ≥ \$100k                 | 209.96   | 350.32 | -476.66 – 896.58   | 0.6   | 0.55       |

**Table S17.** - Weighted ANCOVA table for diabetes and SB.

(controlling for age, sex, body mass index, time of wearing the accelerometer, marital status, self-perceived health, self-perceived mental health, working status, season, smoking status (blood cotinine levels), education level and total household income).

|                          | Estimate | SE    | 95% CI          | t     | p          |
|--------------------------|----------|-------|-----------------|-------|------------|
| Diabetes                 | 12.78    | 6.25  | 0.53 – 25.03    | 2.05  | 0.04       |
| Age                      | 1.84     | 0.18  | 1.48 – 2.19     | 10.11 | 0.0002E-12 |
| BMI                      | 0.24     | 0.33  | -0.41 – 0.88    | 0.73  | 0.47       |
| Sex (women)              | 15.57    | 4.23  | 7.28 – 23.87    | 3.68  | 0.0003     |
| Accelerometer wearing    | 34.85    | 1.2   | 32.5 – 37.2     | 29.02 | 0.0002E-12 |
| Marital status (couple)  | -1.48    | 3.37  | -8.09 – 5.13    | -0.44 | 0.66       |
| Self-rated health        | 18.05    | 4.99  | 8.28 – 27.83    | 3.62  | 0.0003     |
| Self-rated mental health | 7        | 9.06  | -10.77 – 24.76  | 0.77  | 0.44       |
| Worked last year         |          |       |                 |       |            |
| Study/retired            | -6.69    | 6.04  | -18.54 – 5.15   | -1.11 | 0.27       |
| Working                  | -23.12   | 5.17  | -33.25 – -12.99 | -4.47 | 0.0001E-01 |
| Seasons                  |          |       |                 |       |            |
| Spring                   | -1.98    | 4.8   | -11.38 – 7.43   | -0.41 | 0.68       |
| Summer                   | -13.38   | 6.29  | -25.71 – -1.06  | -2.13 | 0.03       |
| Winter                   | 13.47    | 5.85  | 2 – 24.94       | 2.3   | 0.02       |
| Levels of cotinine       | -0.0007  | 0.004 | -0.008 – 0.007  | -0.17 | 0.87       |
| Education                |          |       |                 |       |            |
| High school              | -5.08    | 10.37 | -25.41 – 15.25  | -0.64 | 0.62       |
| Work school              | 14.59    | 10.6  | -6.19 – 35.37   | 1.27  | 0.17       |
| College                  | 14.7     | 11.54 | -7.91 – 37.31   | -0.49 | 0.2        |
| University < Bachelor    | 24.82    | 9.56  | 6.09 – 43.56    | 2.6   | 0.01       |
| Bachelor                 | 23.18    | 9.55  | 4.47 – 41.9     | 2.43  | 0.02       |
| University > Bachelor    | 19.52    | 15.03 | -9.94 – 48.97   | 1.3   | 0.19       |
| Missing                  | -5.16    | 8.06  | -20.95 – 10.64  | -0.64 | 0.52       |
| Household income         |          |       |                 |       |            |
| \$15k-\$19,99k           | 9.84     | 13.77 | -17.14 – 36.83  | 0.72  | 0.48       |
| \$20k-\$29,99k           | 8.46     | 13.17 | -17.36 – 34.28  | 0.64  | 0.52       |
| \$30k-\$39,99k           | 0.78     | 12.8  | -24.3 – 25.87   | 0.06  | 0.95       |
| \$40k-\$49,99k           | -2.43    | 12.92 | -27.76 – 22.9   | -0.19 | 0.85       |
| \$50k-\$59,99k           | 5.43     | 12.33 | -18.75 – 29.59  | 0.44  | 0.66       |
| \$60k-\$79,99k           | -6.75    | 12.44 | -31.13 – 17.63  | -0.54 | 0.59       |
| \$80k-\$99,99k           | -2.95    | 13.04 | -28.5 – 22.61   | -0.23 | 0.82       |
| ≥ \$100k                 | 5.94     | 11.57 | -16.73 – 28.61  | 0.51  | 0.61       |

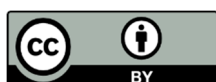

Supplement: sports-07-00113-s001.pdf [file sports-07-00113-s001.pdf]
